# Supplementary material for: A colorimetric and ratiometric NIR fluorescent turn-on fluoride chemodosimeter based on BODIPY derivatives: high selectivity via specific Si–O cleavage
Source: Royal Society of Chemistry journal article supplement (doi:10.1039/c1ra00942g), 2011-11-18
Supplement: c1ra00942g.pdf [file c1ra00942g.pdf]

*Electronic supplementary information (ESI)*

**A colorimetric and ratiometric NIR fluorescent turn-on  
fluoride chemodosimeter based on BODIPY derivatives:  
high selectivity via specific Si-O cleavage**

**Jian Cao,<sup>a,b</sup> Chunchang Zhao,\*<sup>a</sup> Peng Feng,<sup>a</sup> Yulin Zhang,<sup>a</sup> Weihong Zhu\*<sup>a</sup>**

*<sup>a</sup>Shanghai Key Laboratory of Functional Materials Chemistry, Key Laboratory for Advanced  
Materials and Institute of Fine Chemicals, East China University of Science & Technology,  
Shanghai 200237, P. R. China. E-mail: zhaocchang@ecust.edu.cn; whzhu@ecust.edu.cn*

*<sup>b</sup>Shanghai University of Engineering Science, Shanghai 201620, P. R. China.*

***Table of contents***

- 1. General methods**
- 2. Synthesis of BODIPY-OSi**
- 3. Kinetics of fluorescence enhancement profile**
- 4. UPLC-Mass spectra of BODIPY-OSi and BODIPY-OSi + TBAF**
- 5. <sup>1</sup>H NMR and <sup>13</sup>C NMR spectra**
- 6. HRMS spectrum**

## 1. General Methods

All chemical reagents and solvents for synthesis were purchased from commercial suppliers and were used without further purification.  $^1\text{H}$  NMR and  $^{13}\text{C}$  NMR spectra were recorded on a Bruker AV-400 spectrometer with chemical shifts reported in ppm (in  $\text{CDCl}_3$ , TMS as internal standard) at room temperature. Mass spectra were measured on a HP 1100 LC-MS spectrometer.

UV-vis absorption spectra were recorded on a Varian Cary 100 spectrophotometer.

Fluorescence spectra were measured with a Varian CARY Eclipse Fluorescence spectrophotometer. Spectral-grade solvents were used for measurements of UV-vis absorption and fluorescence.

## 2. Synthesis of BODIPY-OSi

Scheme S1

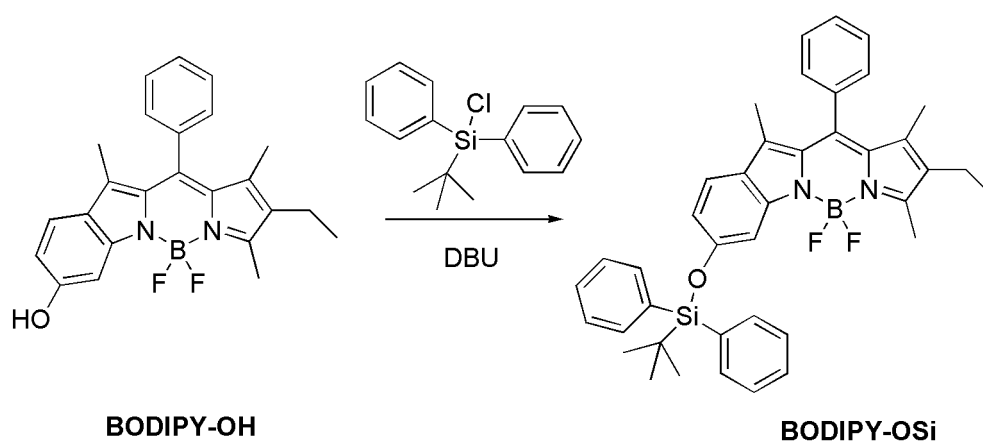

To a solution of **BODIPY-OH** (500 mg, 1.24mmol) in  $\text{CH}_2\text{Cl}_2$  (25 mL) was added DBU (234 mg, 1.24 mmol) at  $-15\text{ }^\circ\text{C}$ , the resulted solution was stirred for another 15 min at room temperature, the resulted solution was stirred for another 15 min at  $-15\text{ }^\circ\text{C}$ , followed by the addition of *tert*-butyldiphenylchlorosilane (681 mg, 2.48

mmol). The resulting mixture was stirred for 10 min at -15 °C, quenched with 0.1M HCl (1.0 mL), extracted with CH<sub>2</sub>Cl<sub>2</sub>, washed with H<sub>2</sub>O. The combined organic extracts were dried with anhydrous Na<sub>2</sub>SO<sub>4</sub>, and the solvent was removed in vacuo. The crude product was purified by flash chromatography to afford 557 mg (70%).

**BODIPY-OSi:** <sup>1</sup>H NMR (400 MHz, CDCl<sub>3</sub>): δ 1.00-1.04 (t, *J* = 7.6 Hz, 3H, -CH<sub>2</sub>CH<sub>3</sub>), 1.11 (s, 9H, -CH<sub>3</sub>), 1.36 (s, 3H, -CH<sub>3</sub>), 1.49 (s, 3H, -CH<sub>3</sub>), 2.33-2.38 (q, *J* = 7.6 Hz, 2H, -CH<sub>2</sub>CH<sub>3</sub>), 2.67 (s, 3H, -CH<sub>3</sub>), 6.29-6.31 (dd, *J*<sub>1</sub> = 2.4 Hz, *J*<sub>2</sub> = 2 Hz, 1H), 7.02-7.04 (d, *J* = 8.8 Hz, 1H), 7.29-7.31 (m, 3H), 7.34-7.42 (m, 6H), 7.50-7.51 (m, 3H), 7.75-7.77 (m, 4H); <sup>13</sup>C NMR (100 MHz, CDCl<sub>3</sub>): δ 11.27, 12.15, 13.39, 14.26, 17.20, 19.57, 26.55, 103.98, 115.90, 121.54, 127.17, 127.78, 128.29, 129.10, 129.23, 129.67, 129.86, 132.52, 133.01, 133.42, 134.81, 135.18, 135.39, 135.53, 135.70, 136.73, 141.37, 141.51, 146.69, 157.68, 161.78; HRMS (ESI) calcd for C<sub>40</sub>H<sub>40</sub>BF<sub>2</sub>N<sub>2</sub>OSi: 641.2971; found: 641.2986. [M - H]<sup>-</sup>.

### Kinetics of fluorescence enhancement profile

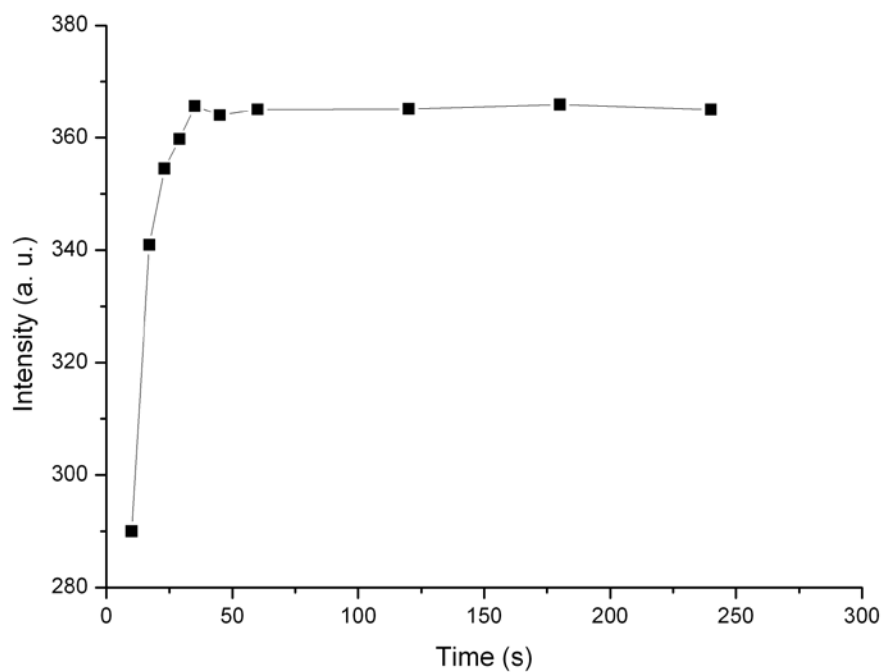

**Fig. S1.** Kinetics of fluorescence enhancement profile of **BODIPY-OSi** ( $5 \times 10^{-6}$  M) at 676 nm in the presence of  $F^-$  (50 equiv),  $\lambda_{ex} = 644$  nm. The spectra data were obtained at room temperature.

### 3. UPLC-Mass spectra of BODIPY-OSi and BODIPY-OSi + TBAF

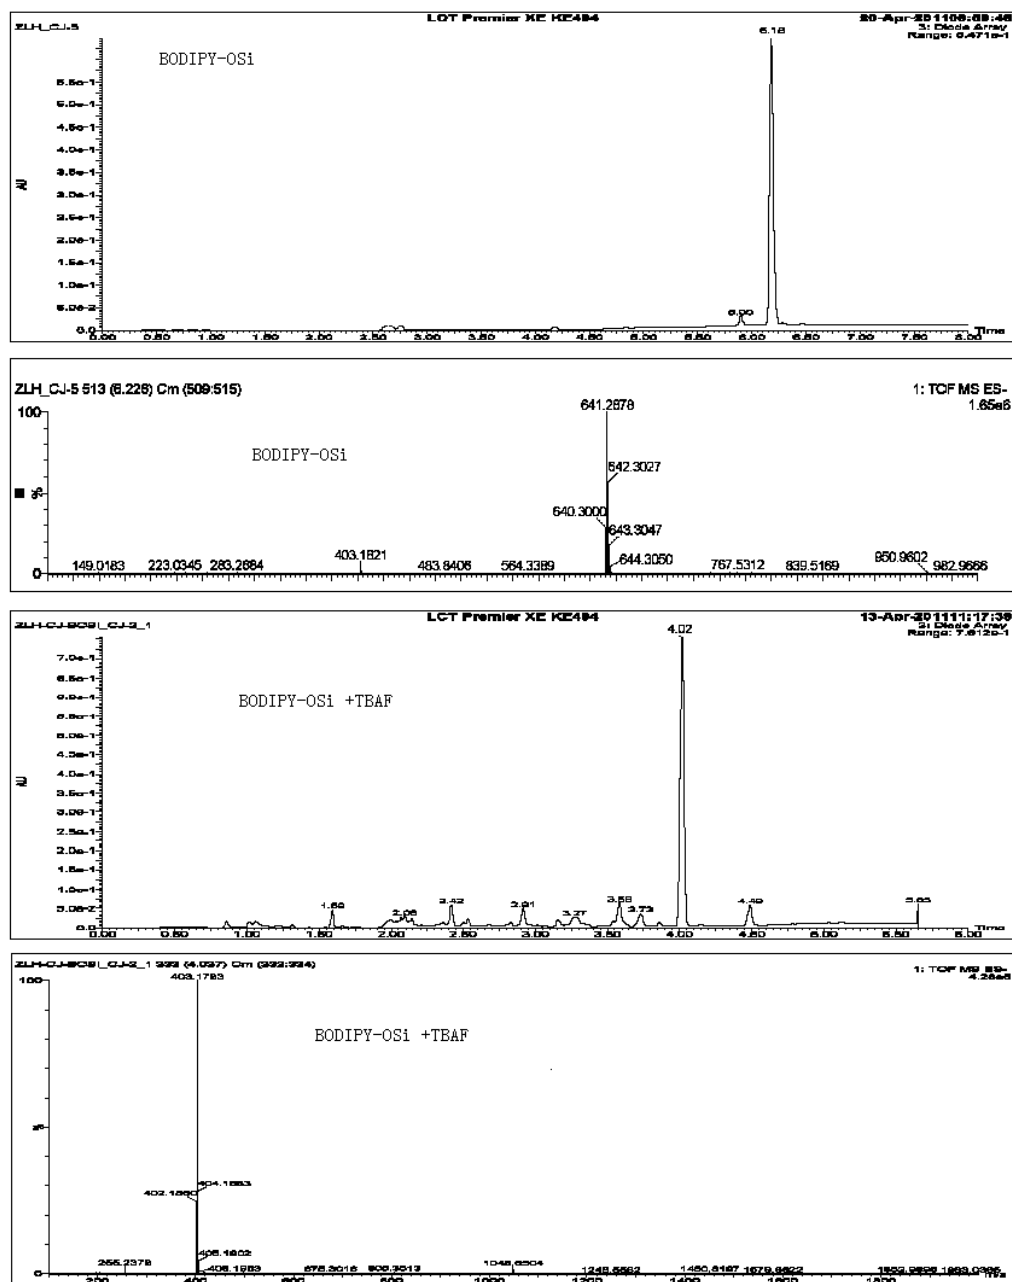

Fig. S2. UPLC-Mass spectra of **BODIPY-OSi** and **BODIPY-OSi + TBAF**.

#### 4. $^1\text{H}$ NMR and $^{13}\text{C}$ NMR spectra

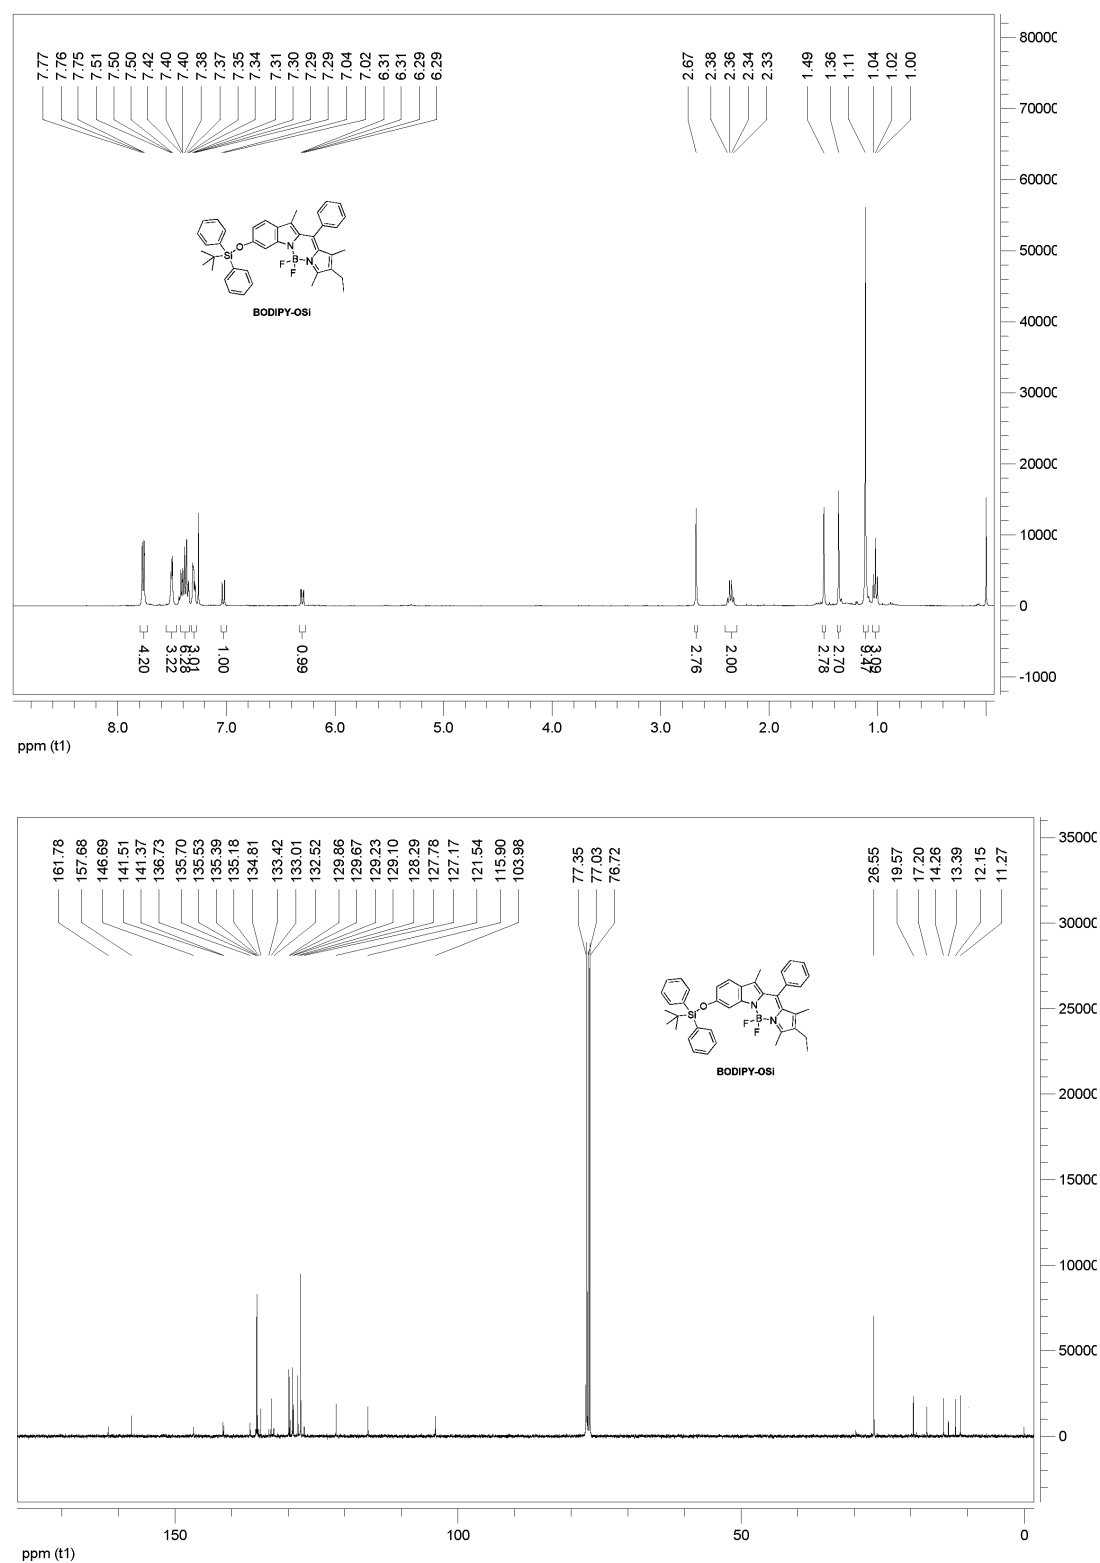

**Fig. S3.**  $^1\text{H}$  NMR and  $^{13}\text{C}$  NMR spectra of **BODIPY-OSi** (in  $\text{CDCl}_3$ )

## 5. HRMS spectrum

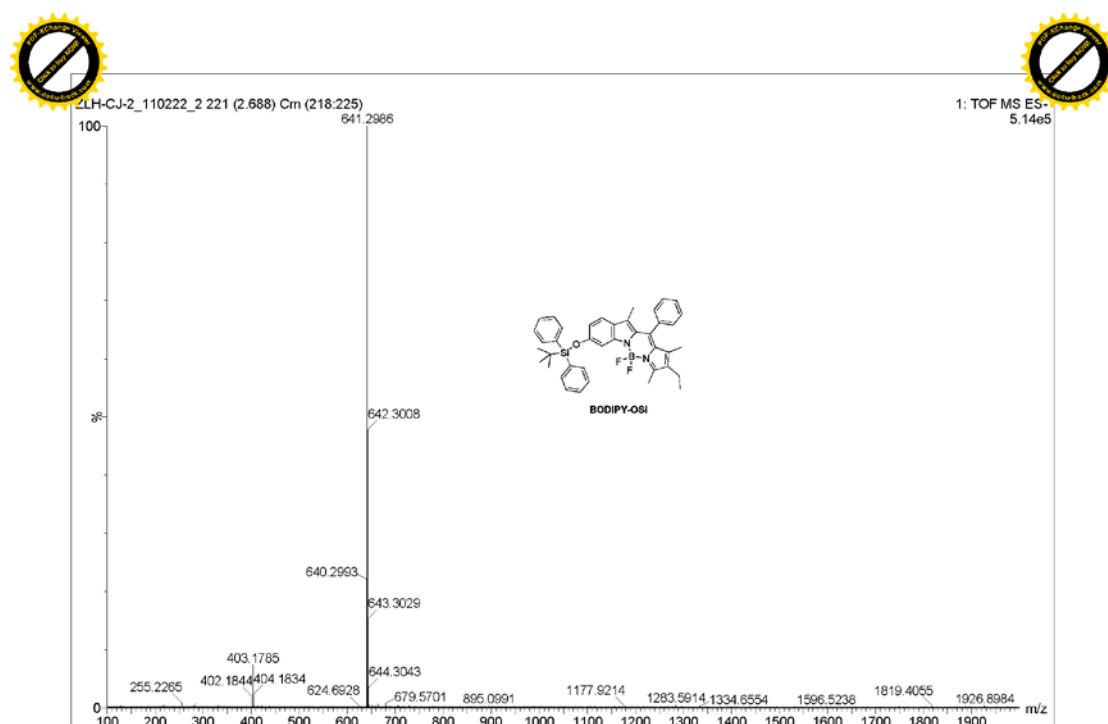

Fig. S4. HRMS spectrum of **BODIPY-OSi**
